# Supplementary material
Source: Springer Nature journal article supplement (https://www.springermedizin.de/resource/supplementary/12885_2013_4699_MOESM7_ESM.pdf/9467030)

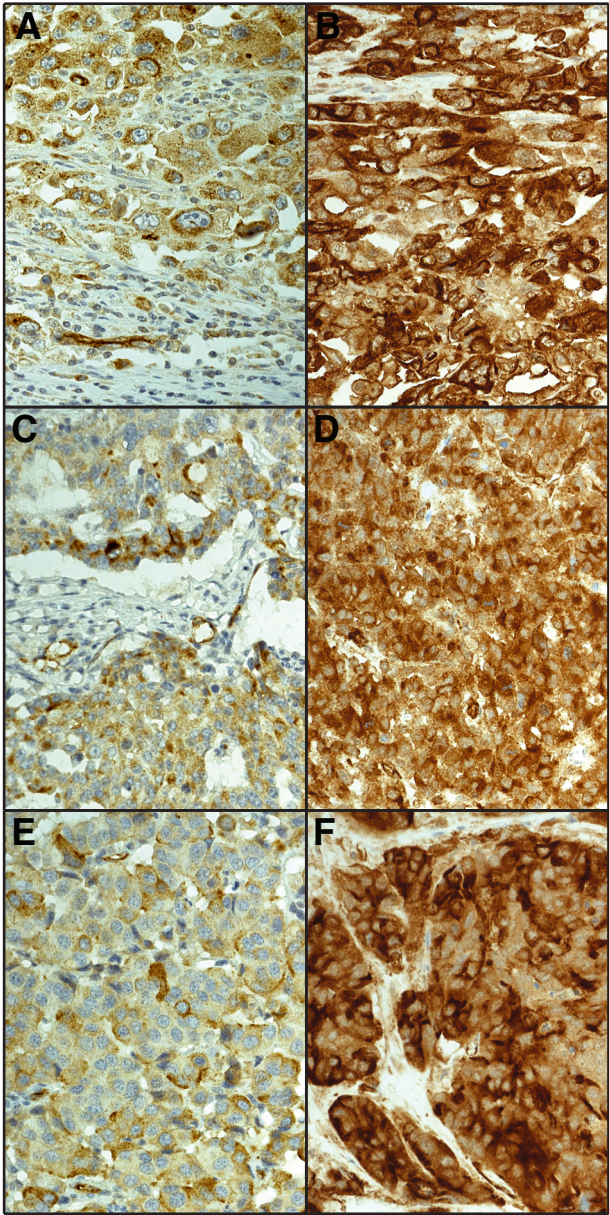

**Figure 2**

Supplement: MOESM7 [file 9467030]
